# Supplementary material for: Experimental and computational studies on ruthenium(ii) bis-diimine complexes of N,N′-chelate ligands: the origin of changes in absorption spectra upon oxidation and reduction
Source: Royal Society of Chemistry journal article supplement (doi:10.1039/c8cp05016c), 2019-01-01
Supplement: c8cp05016c1.pdf [file c8cp05016c1.pdf]

## Supplementary Data

### Synthesis of the ruthenium(II) bipyridyl *p*-bromobenzoyl-*N'*-(1,10-phenanthroline-5-yl)-thiourea [Ru(bpy)<sub>2</sub>(phen-*p*-BrBT)](PF<sub>6</sub>)<sub>2</sub>

The reaction was performed under dark conditions and in inert argon gas. A 10% molar excess of *n*-benzoyl-*n'*-(1,10-phenanthroline-5-yl)thiourea (0.072 mmol) was dissolved in 10 mL of hot ethanol and was added to 0.064 mmol of *cis*-[Ru(bpy)<sub>2</sub>Cl<sub>2</sub>·2H<sub>2</sub>O] dissolved in 5 mL of hot distilled water (H<sub>2</sub>O). The mixture was heated for 3 hours at 100 °C. The solution was reduced to approximately one third of the original volume to give a precipitate. The solid was filtered off and then an excess amount of NH<sub>4</sub>PF<sub>6</sub> (0.8 mmol) dissolved in cold distilled water was added into the filtrate, yielding a bright brown precipitate. The precipitate was then filtered through a Buchner funnel, washed with cold H<sub>2</sub>O (3 x 10 mL), followed by cold diethyl ether (3 x 10 mL) and dried in vacuo.

**Table I.** TD-DFT calculated absorption bands and their composition for the [Ru(bpy)<sub>2</sub>(phen-*p*-BrBT)]<sup>2+</sup> complex. Transition with oscillator strength greater than 0.01 are shown, the major contributing transitions have more than 5% contribution to the absorption band.

| Wavelength (nm) | Oscillator Strength | Transitions (characters) [contributions]                                                                                                                                                                                                                                                                                                                                                                                                                                                                                         |
|-----------------|---------------------|----------------------------------------------------------------------------------------------------------------------------------------------------------------------------------------------------------------------------------------------------------------------------------------------------------------------------------------------------------------------------------------------------------------------------------------------------------------------------------------------------------------------------------|
| 432.69          | 0.0345              | HOMO-1 (Ru) → LUMO (π* <sub>bpy,phen</sub> ) [75%], HOMO-1(Ru) → LUMO+1 (π* <sub>bpy,phen</sub> ) [8%], HOMO (Ru) → LUMO+3 (π* <sub>bpy,phen</sub> ) [7%]                                                                                                                                                                                                                                                                                                                                                                        |
| 418.02          | 0.1450              | HOMO-2 (Ru) → LUMO+2 (π* <sub>bpy,phen</sub> ) [28%], HOMO-1(Ru) → LUMO (π* <sub>bpy,phen</sub> ) [19%], HOMO-2 (Ru) → LUMO+1 (π* <sub>bpy,phen</sub> ) [12%], HOMO (Ru) → LUMO+3 (π* <sub>bpy,phen</sub> ) [10%], HOMO-1 (Ru) → LUMO+1 (π* <sub>bpy,phen</sub> ) [9%], HOMO-1 (Ru) → LUMO+2 (π* <sub>bpy,phen</sub> ) [7%], HOMO (Ru) → LUMO+2 (π* <sub>bpy,phen</sub> ) [5%]                                                                                                                                                   |
| 414.66          | 0.1328              | HOMO-2 (Ru) → LUMO+1 (π* <sub>bpy,phen</sub> ) (35%), HOMO-2 (Ru) → LUMO+2 (π* <sub>bpy,phen</sub> ) [16%], HOMO-1 (Ru) → LUMO+2 (π* <sub>bpy,phen</sub> ) [15%], HOMO-2 (Ru) → LUMO (π* <sub>bpy,phen</sub> ) [12%], HOMO-1 (Ru) → LUMO+3 (π* <sub>bpy,phen</sub> ) [10%], HOMO-1 (Ru) → LUMO+1 (π* <sub>bpy,phen</sub> ) [7%]                                                                                                                                                                                                  |
| 398.31          | 0.0419              | HOMO-2 (Ru) → LUMO+3 (π* <sub>bpy,phen</sub> ) [71%], HOMO-1 (Ru) → LUMO+3 (π* <sub>bpy,phen</sub> ) [8%], HOMO-2 (Ru) → LUMO+2 (π* <sub>bpy,phen</sub> ) [7%]                                                                                                                                                                                                                                                                                                                                                                   |
| 397.06          | 0.0267              | HOMO-1 (Ru) → LUMO+3 (π* <sub>bpy,phen</sub> ) [56%], HOMO-1 (Ru) → LUMO+1 (π* <sub>bpy,phen</sub> ) [15%], HOMO-2 (Ru) → LUMO+3 (π* <sub>bpy,phen</sub> ) [12%], HOMO-1 (Ru) → LUMO+2 (π* <sub>bpy,phen</sub> ) [12%]                                                                                                                                                                                                                                                                                                           |
| 328.49          | 0.0164              | HOMO-2 (Ru) → LUMO+5 (π* <sub>bpy</sub> ) [93%]                                                                                                                                                                                                                                                                                                                                                                                                                                                                                  |
| 315.99          | 0.0258              | HOMO (Ru) → LUMO+8 (π* <sub>bpy</sub> ) [85%], HOMO-1 (Ru) → LUMO+6 (π* <sub>bpy</sub> ) [7%]                                                                                                                                                                                                                                                                                                                                                                                                                                    |
| 311.34          | 0.0340              | HOMO-1 (Ru) → LUMO+6 (π* <sub>bpy</sub> ) [83%], HOMO (Ru) → LUMO+8 (π* <sub>bpy</sub> ) [7%]                                                                                                                                                                                                                                                                                                                                                                                                                                    |
| 307.91          | 0.0166              | HOMO-1 (Ru) → LUMO+7 (π* <sub>bpy</sub> ) [82%]                                                                                                                                                                                                                                                                                                                                                                                                                                                                                  |
| 304.19          | 0.1551              | HOMO-4 ( <i>n</i> <sub>C-S</sub> ) → LUMO+4 (π* <sub>BrBT</sub> ) [85%]                                                                                                                                                                                                                                                                                                                                                                                                                                                          |
| 303.66          | 0.0408              | HOMO-2 (Ru) → LUMO+8 (π*) [74%], HOMO-4 ( <i>n</i> <sub>C-S</sub> ) → LUMO+4 (π* <sub>BrBT</sub> ) [6%], HOMO-7 (π <sub>bpy</sub> ) → LUMO (π* <sub>bpy,phen</sub> ) [5%]                                                                                                                                                                                                                                                                                                                                                        |
| 297.55          | 0.0627              | HOMO-1 (Ru) → LUMO+8 (π* <sub>bpy</sub> ) [28%], HOMO-2 (Ru) → LUMO+6 (π* <sub>bpy</sub> ) [16%], HOMO-2 (Ru) → LUMO+7 (π* <sub>bpy</sub> ) [14%], HOMO-6 (Ru) → LUMO (π* <sub>bpy</sub> ) [11%], HOMO (Ru) → LUMO+7 (π* <sub>bpy</sub> ) [8%], HOMO-1 (Ru) → LUMO +9 (π* <sub>phen</sub> ) [8%]                                                                                                                                                                                                                                 |
| 293.40          | 0.0364              | HOMO-7 (π <sub>bpy</sub> ) → LUMO (π* <sub>bpy,phen</sub> ) [16%], HOMO-9 (π <sub>phen</sub> ) → LUMO (π* <sub>bpy,phen</sub> ) [11%], HOMO-8 (π <sub>phen</sub> ) → LUMO+3 (π* <sub>bpy,phen</sub> ) [10%], HOMO-6 (π <sub>bpy</sub> ) → LUMO+1 (π* <sub>bpy,phen</sub> ) [7%], HOMO-8 (π <sub>phen</sub> ) → LUMO +2 (π* <sub>bpy,phen</sub> ) [7%], HOMO-5 (BrBz) → LUMO (π* <sub>bpy,phen</sub> ) [6%], HOMO-5 (π* <sub>BrBT</sub> ) → LUMO+1 (π*) [6%], HOMO-6 (π <sub>bpy</sub> ) → LUMO +3 (π* <sub>bpy,phen</sub> ) [5%] |
| 292.99          | 0.0157              | HOMO-6 (π <sub>bpy</sub> ) → LUMO (π* <sub>bpy,phen</sub> ) [55%], HOMO-8 (π <sub>phen</sub> ) → LUMO (π* <sub>bpy,phen</sub> ) [19%]                                                                                                                                                                                                                                                                                                                                                                                            |
| 284.93          | 0.0268              | HOMO-5 (π <sub>BrBT</sub> ) → LUMO+1 (π* <sub>bpy,phen</sub> ) [34%], HOMO-5 (π* <sub>BrBT</sub> ) → LUMO +3 (π*                                                                                                                                                                                                                                                                                                                                                                                                                 |

|        |        |                                                                                                                                                                                                                                                                                                                                                                                                                                                                                                                                                                                                                                                                        |
|--------|--------|------------------------------------------------------------------------------------------------------------------------------------------------------------------------------------------------------------------------------------------------------------------------------------------------------------------------------------------------------------------------------------------------------------------------------------------------------------------------------------------------------------------------------------------------------------------------------------------------------------------------------------------------------------------------|
| 281.22 | 0.0902 | $\pi_{\text{bpy,phen}}^*$ [20%], HOMO-5 ( $\pi_{\text{BrBT}}$ ) $\rightarrow$ LUMO+2 ( $\pi_{\text{bpy,phen}}^*$ ) [17%], HOMO-6 ( $\pi_{\text{bpy}}$ ) $\rightarrow$ LUMO+3 ( $\pi_{\text{bpy,phen}}^*$ ) [6%] HOMO-5 ( $\pi_{\text{BrBT}}$ ) $\rightarrow$ LUMO ( $\pi_{\text{bpy,phen}}^*$ ) [5%]<br>HOMO-7 ( $\pi_{\text{bpy}}$ ) $\rightarrow$ LUMO+1 ( $\pi_{\text{bpy,phen}}^*$ ) [23%], HOMO-7 ( $\pi_{\text{bpy}}$ ) $\rightarrow$ LUMO+2 ( $\pi_{\text{bpy,phen}}^*$ ) [20%], HOMO-7 ( $\pi_{\text{bpy}}$ ) $\rightarrow$ LUMO+3 ( $\pi_{\text{bpy,phen}}^*$ ) [16%], HOMO-8 ( $\pi_{\text{phen}}$ ) $\rightarrow$ LUMO+3 ( $\pi_{\text{bpy,phen}}^*$ ) [7%] |
| 280.97 | 0.0771 | HOMO-8 ( $\pi_{\text{phen}}$ ) $\rightarrow$ LUMO+2 ( $\pi_{\text{bpy,phen}}^*$ ) [22%], HOMO-5 ( $\pi_{\text{BrBT}}$ ) $\rightarrow$ LUMO+2 ( $\pi_{\text{bpy,phen}}^*$ ) [15%], HOMO-5 ( $\pi_{\text{BrBT}}$ ) $\rightarrow$ LUMO+3 ( $\pi_{\text{bpy,phen}}^*$ ) [15%], HOMO-8 ( $\pi_{\text{phen}}$ ) $\rightarrow$ LUMO+3 ( $\pi_{\text{bpy,phen}}^*$ ) [14%], HOMO-5 ( $\pi_{\text{BrBT}}$ ) $\rightarrow$ LUMO+2 ( $\pi_{\text{bpy,phen}}^*$ ) [6%], HOMO-5 ( $\pi_{\text{BrBT}}$ ) $\rightarrow$ LUMO+3 ( $\pi_{\text{bpy,phen}}^*$ ) [5%]                                                                                                                     |
| 280.08 | 0.0554 | HOMO-5 ( $\pi_{\text{BrBT}}$ ) $\rightarrow$ LUMO+1 ( $\pi_{\text{bpy,phen}}^*$ ) [30%], HOMO-5 ( $\pi_{\text{BrBT}}$ ) $\rightarrow$ LUMO+2 ( $\pi_{\text{bpy,phen}}^*$ ) [18%], HOMO-8 ( $\pi_{\text{phen}}$ ) $\rightarrow$ LUMO +1 ( $\pi_{\text{bpy,phen}}^*$ ) [12%], HOMO-7 ( $\pi_{\text{bpy}}$ ) $\rightarrow$ LUMO+3 ( $\pi_{\text{bpy,phen}}^*$ ) [10%], HOMO-5 ( $\pi_{\text{BrBT}}$ ) $\rightarrow$ LUMO ( $\pi_{\text{bpy,phen}}^*$ ) [5%]                                                                                                                                                                                                               |
| 278.94 | 0.3612 | HOMO-7 ( $\pi_{\text{bpy}}$ ) $\rightarrow$ LUMO +3 ( $\pi_{\text{bpy,phen}}^*$ ) [40%], HOMO-5 ( $\pi_{\text{BrBT}}$ ) $\rightarrow$ LUMO+4 ( $\pi_{\text{BrBT}}^*$ ) [10%], HOMO-8 ( $\pi_{\text{phen}}$ ) $\rightarrow$ LUMO+1 ( $\pi_{\text{bpy,phen}}^*$ ) [7%], HOMO-2 (Ru) $\rightarrow$ LUMO+7 ( $\pi_{\text{bpy}}^*$ ) [7%], HOMO-7 ( $\pi_{\text{bpy}}$ ) $\rightarrow$ LUMO +2 ( $\pi^*$ ) [5%]                                                                                                                                                                                                                                                             |
| 278.58 | 0.0923 | HOMO-5 ( $\pi_{\text{BrBT}}$ ) $\rightarrow$ LUMO+4 ( $\pi_{\text{BrBT}}^*$ ) [46%], HOMO-8 ( $\pi_{\text{phen}}$ ) $\rightarrow$ LUMO+4 ( $\pi_{\text{BrBT}}^*$ ) [9%], HOMO-12 ( $\pi_{\text{BrBT}}$ ) $\rightarrow$ LUMO+4 ( $\pi_{\text{BrBT}}^*$ ) [6%], HOMO-7 ( $\pi_{\text{bpy}}$ ) $\rightarrow$ LUMO+3 ( $\pi_{\text{bpy,phen}}^*$ ) [5%], HOMO-7 ( $\pi_{\text{bpy}}$ ) $\rightarrow$ LUMO+3 ( $\pi_{\text{bpy,phen}}^*$ ) [5%]                                                                                                                                                                                                                             |
| 277.42 | 0.2220 | HOMO-5 ( $\pi_{\text{BrBT}}$ ) $\rightarrow$ LUMO+3 ( $\pi_{\text{bpy,phen}}^*$ ) [31%], HOMO-5 ( $\pi_{\text{BrBT}}$ ) $\rightarrow$ LUMO+2 ( $\pi_{\text{bpy,phen}}^*$ ) [20%], HOMO-6 ( $\pi_{\text{bpy}}$ ) $\rightarrow$ LUMO+3 ( $\pi_{\text{bpy,phen}}^*$ ) [10%], HOMO-7 ( $\pi_{\text{bpy}}$ ) $\rightarrow$ LUMO+1 ( $\pi_{\text{bpy,phen}}^*$ ) [7%], HOMO-6 ( $\pi_{\text{bpy}}$ ) $\rightarrow$ LUMO+2 ( $\pi_{\text{bpy,phen}}^*$ ) [7%]                                                                                                                                                                                                                 |
| 276.09 | 0.3505 | HOMO-8 ( $\pi_{\text{phen}}$ ) $\rightarrow$ LUMO+3 ( $\pi_{\text{bpy,phen}}^*$ ) [28%], HOMO-8 ( $\pi_{\text{phen}}$ ) $\rightarrow$ LUMO+2 ( $\pi_{\text{bpy,phen}}^*$ ) [16%], HOMO-5 ( $\pi_{\text{BrBT}}$ ) $\rightarrow$ LUMO+3 ( $\pi_{\text{bpy,phen}}^*$ ) [10%], HOMO-5 ( $\pi_{\text{BrBT}}$ ) $\rightarrow$ LUMO+2 ( $\pi_{\text{bpy,phen}}^*$ ) [7%], HOMO-7 ( $\pi_{\text{phen}}$ ) $\rightarrow$ LUMO+1 ( $\pi_{\text{bpy,phen}}^*$ ) [7%], HOMO-2 (Ru) $\rightarrow$ LUMO+8 ( $\pi_{\text{bpy}}^*$ ) [6%]                                                                                                                                              |
| 271.52 | 0.2461 | HOMO-8 ( $\pi_{\text{phen}}$ ) $\rightarrow$ LUMO+4 ( $\pi_{\text{BrBT}}^*$ ) [28%], HOMO-5 ( $\pi_{\text{BrBT}}$ ) $\rightarrow$ LUMO+4 ( $\pi_{\text{BrBT}}^*$ ) [18%], HOMO-9 ( $\pi_{\text{phen}}$ ) $\rightarrow$ LUMO+1 ( $\pi_{\text{bpy,phen}}^*$ ) [13%], HOMO-6 ( $\pi_{\text{bpy}}$ ) $\rightarrow$ LUMO +4 ( $\pi_{\text{BrBT}}^*$ ) [10%], HOMO-12 ( $\pi_{\text{BrBT}}$ ) $\rightarrow$ LUMO+4 ( $\pi_{\text{BrBT}}^*$ ) [8%], HOMO-9 ( $\pi_{\text{phen}}$ ) $\rightarrow$ LUMO ( $\pi_{\text{bpy,phen}}^*$ ) [7%], HOMO-3 (Ru) $\rightarrow$ LUMO+11 ( $\pi_{\text{BrBT}}^*$ ) [5%]                                                                    |
| 271.30 | 0.0711 | HOMO-9 ( $\pi_{\text{phen}}$ ) $\rightarrow$ LUMO ( $\pi_{\text{bpy,phen}}^*$ ) [33%], HOMO-9 ( $\pi_{\text{phen}}$ ) $\rightarrow$ LUMO+1 ( $\pi_{\text{bpy,phen}}^*$ ) [32%], HOMO-9 ( $\pi_{\text{phen}}$ ) $\rightarrow$ LUMO+2 ( $\pi_{\text{bpy,phen}}^*$ ) [11%], HOMO-5 ( $\pi_{\text{BrBT}}$ ) $\rightarrow$ LUMO+4 ( $\pi_{\text{BrBT}}^*$ ) [6%], HOMO-8 ( $\pi_{\text{phen}}$ ) $\rightarrow$ LUMO+4 ( $\pi_{\text{BrBT}}^*$ ) [5%]                                                                                                                                                                                                                        |
| 266.64 | 0.0179 | HOMO-9 ( $\pi_{\text{phen}}$ ) $\rightarrow$ LUMO+3 ( $\pi_{\text{bpy,phen}}^*$ ) [47%], HOMO-3 (Ru) $\rightarrow$ LUMO+9 ( $\pi_{\text{phen}}^*$ ) [17%], HOMO-3 (Ru) $\rightarrow$ LUMO+8 ( $\pi_{\text{bpy}}^*$ ) [6%], HOMO-4 ( $n_{\text{C-S}}$ ) $\rightarrow$ LUMO+5 ( $\pi_{\text{bpy}}^*$ ) [6%]                                                                                                                                                                                                                                                                                                                                                              |
| 265.18 | 0.0297 | HOMO-3 (Ru) $\rightarrow$ LUMO+11 ( $\pi_{\text{BrBT}}^*$ ) (38%), HOMO-3 (Ru) $\rightarrow$ LUMO+10 ( $\pi_{\text{BrBT}}^*$ ) (29%), HOMO-9 ( $\pi_{\text{phen}}$ ) $\rightarrow$ LUMO+3 ( $\pi_{\text{bpy,phen}}^*$ ) [7%], HOMO-8 ( $\pi_{\text{phen}}$ ) $\rightarrow$ LUMO +4 ( $\pi_{\text{BrBT}}^*$ ) [6%]                                                                                                                                                                                                                                                                                                                                                      |
| 261.80 | 0.0315 | HOMO-3 (Ru) $\rightarrow$ LUMO+8 ( $\pi_{\text{bpy}}^*$ ) [52%], HOMO-3 (Ru) $\rightarrow$ LUMO+9 ( $\pi_{\text{phen}}^*$ ) [18 %], HOMO-9 ( $\pi_{\text{phen}}$ ) $\rightarrow$ LUMO+3 ( $\pi_{\text{bpy,phen}}^*$ ) [8%]                                                                                                                                                                                                                                                                                                                                                                                                                                             |
| 259.19 | 0.6078 | HOMO-9 ( $\pi_{\text{phen}}$ ) $\rightarrow$ LUMO ( $\pi_{\text{bpy,phen}}^*$ ) [24%], HOMO-9 ( $\pi_{\text{phen}}$ ) $\rightarrow$ LUMO+1 ( $\pi_{\text{bpy,phen}}^*$ ) [17%], HOMO-9 ( $\pi_{\text{phen}}$ ) $\rightarrow$ LUMO+2 ( $\pi_{\text{bpy,phen}}^*$ ) [11%], HOMO-8 ( $\pi_{\text{phen}}$ ) $\rightarrow$ LUMO+3 ( $\pi_{\text{bpy,phen}}^*$ ) [11%]                                                                                                                                                                                                                                                                                                       |
| 250.26 | 0.0607 | HOMO-1 (Ru) $\rightarrow$ LUMO+12 ( $\pi_{\text{phen}}^*$ ) [45%], HOMO-1 (Ru) $\rightarrow$ LUMO+10 ( $\pi_{\text{BrBT}}^*$ ) [29%], HOMO-1 (Ru) $\rightarrow$ LUMO+11 ( $\pi_{\text{BrBT}}^*$ ) [13%]                                                                                                                                                                                                                                                                                                                                                                                                                                                                |
| 245.81 | 0.0500 | HOMO-7 ( $\pi_{\text{phen}}$ ) $\rightarrow$ LUMO+5 ( $\pi_{\text{bpy}}^*$ ) [54%]                                                                                                                                                                                                                                                                                                                                                                                                                                                                                                                                                                                     |
| 241.27 | 0.0571 | HOMO-5 ( $\pi_{\text{BrBT}}$ ) $\rightarrow$ LUMO +5 ( $\pi_{\text{bpy}}^*$ ) [46%], HOMO-8 ( $\pi_{\text{phen}}$ ) $\rightarrow$ LUMO+5 ( $\pi_{\text{bpy}}^*$ ) [31%]                                                                                                                                                                                                                                                                                                                                                                                                                                                                                                |

**Table II.** TD-DFT calculated absorption bands and their composition for the [Ru(phen)<sub>2</sub>(phen-*p*-BrBT)]<sup>2+</sup> complex. Transition with oscillator strength greater than 0.01 are shown, the major contributing transitions have more than 5% contribution to the absorption band.

| Wavelength (nm) | Oscillator Strength | Transitions (characters) [contributions] |
|-----------------|---------------------|------------------------------------------|
|-----------------|---------------------|------------------------------------------|

|        |        |                                                                                                                                                                                                                                                                                                                                                                                          |
|--------|--------|------------------------------------------------------------------------------------------------------------------------------------------------------------------------------------------------------------------------------------------------------------------------------------------------------------------------------------------------------------------------------------------|
| 431.38 | 0.0504 | HOMO-1 (Ru) → LUMO ( $\pi^*_{\text{phen}}$ ) [45%] HOMO-1(Ru) → LUMO+1 ( $\pi^*_{\text{phen}}$ ) [10%], HOMO (Ru) → LUMO ( $\pi^*_{\text{phen}}$ ) [6%], HOMO(Ru) → LUMO+1 ( $\pi^*_{\text{phen}}$ ) [26%], HOMO(Ru) → LUMO+2 ( $\pi^*_{\text{phen}}$ ) [5%]                                                                                                                             |
| 424.70 | 0.0297 | HOMO-1 (Ru) → LUMO+2 ( $\pi^*_{\text{phen}}$ ) [27%], HOMO (Ru) → LUMO+1 ( $\pi^*_{\text{phen}}$ ) [23%], HOMO-2 (Ru) → LUMO ( $\pi^*_{\text{phen}}$ ) [15%], HOMO-2 (Ru) → LUMO+1 ( $\pi^*_{\text{phen}}$ ) [13%], HOMO (Ru) → LUMO ( $\pi^*_{\text{phen}}$ ) [5%],                                                                                                                     |
| 418.77 | 0.0998 | HOMO-1 (Ru) → LUMO+3 ( $\pi^*_{\text{bpy}}$ ) [38%], HOMO-1 (Ru) → LUMO ( $\pi^*_{\text{phen}}$ ) [13%]. HOMO-2 (Ru) → LUMO+1 ( $\pi^*_{\text{phen}}$ ) [7%]                                                                                                                                                                                                                             |
| 413.71 | 0.1076 | HOMO-1 → LUMO+3 ( $\pi^*_{\text{phen}}$ ) [40%], HOMO-2 (Ru) → LUMO+2 ( $\pi^*_{\text{phen}}$ ) [34%], HOMO-2 (Ru) → LUMO+1 ( $\pi^*_{\text{phen}}$ ) [12%], HOMO (Ru) → LUMO+5 ( $\pi^*_{\text{phen}}$ ) [7%]                                                                                                                                                                           |
| 405.53 | 0.0641 | HOMO-2 → LUMO+1 ( $\pi^*_{\text{phen}}$ ) [22%], HOMO-1 (Ru) → LUMO ( $\pi^*_{\text{phen}}$ ) [16%], HOMO-1 (Ru) → LUMO ( $\pi^*_{\text{phen}}$ ) → LUMO+1 ( $\pi^*_{\text{phen}}$ ) [20%], HOMO (Ru) → LUMO ( $\pi^*_{\text{phen}}$ ) [21%], HOMO-2 (Ru) → LUMO ( $\pi^*_{\text{phen}}$ ) [5%]                                                                                          |
| 401.77 | 0.0628 | HOMO-1 (Ru) → LUMO+1 ( $\pi^*_{\text{phen}}$ ) [37%], HOMO-1 (Ru) → LUMO+2 ( $\pi^*_{\text{phen}}$ ) [13%], HOMO (Ru) → LUMO+4 ( $\pi^*_{\text{phen}}$ ) [17%], HOMO-2 (Ru) → LUMO +1 ( $\pi^*_{\text{phen}}$ ) [6%]                                                                                                                                                                     |
| 395.87 | 0.0671 | HOMO (Ru) → LUMO+5 ( $\pi^*_{\text{phen}}$ ) [81%]                                                                                                                                                                                                                                                                                                                                       |
| 383.90 | 0.0410 | HOMO-1 (Ru) → LUMO +4 ( $\pi^*_{\text{phen}}$ ) [76%]                                                                                                                                                                                                                                                                                                                                    |
| 376.23 | 0.0350 | HOMO-2 (Ru) → LUMO +5 ( $\pi^*_{\text{phen}}$ ) [89%]                                                                                                                                                                                                                                                                                                                                    |
| 357.67 | 0.0272 | HOMO-4 ( $\pi_{\text{BrBT}}$ ) → LUMO ( $\pi^*_{\text{phen}}$ ) [55%], HOMO-4 ( $\pi_{\text{BrBT}}$ ) → LUMO+1 ( $\pi^*_{\text{phen}}$ ) [18%], HOMO-4 ( $n_{\text{C=S}}$ ) → LUMO ( $\pi^*_{\text{BrBT}}$ ) [15%]                                                                                                                                                                       |
| 342.43 | 0.0256 | HOMO-4 ( $\pi_{\text{BrBT}}$ ) → LUMO+1 ( $\pi^*_{\text{phen}}$ ) [54%], HOMO-4 ( $\pi_{\text{BrBT}}$ ) → LUMO+2 ( $\pi^*_{\text{phen}}$ ) [18%], HOMO-4 ( $\pi_{\text{BrBT}}$ ) → LUMO ( $\pi^*_{\text{phen}}$ ) [6%],                                                                                                                                                                  |
| 310.11 | 0.0602 | HOMO-4 ( $\pi_{\text{BrBT}}$ ) → LUMO+6 ( $\pi^*_{\text{BrBT}}$ ) [75%], HOMO-4 ( $\pi_{\text{BrBT}}$ ) → LUMO+4 ( $\pi^*_{\text{phen}}$ ) [7%], HOMO-3 ( $n_{\text{C=S}}$ ) → LUMO+4 ( $\pi^*_{\text{phen}}$ ) [7%]                                                                                                                                                                     |
| 302.58 | 0.0347 | HOMO-4 ( $\pi_{\text{BrBT}}$ ) → LUMO+4 ( $\pi^*_{\text{phen}}$ ) [71%], HOMO-8 ( $\pi_{\text{phen}}$ & $n_{\text{C=S}}$ ) → LUMO ( $\pi^*_{\text{phen}}$ ) [7%], HOMO-5 ( $\pi_{\text{phen}}$ ) → LUMO ( $\pi^*_{\text{phen}}$ ) [9%]                                                                                                                                                   |
| 302.50 | 0.0885 | HOMO-5 ( $\pi_{\text{phen}}$ ) → LUMO ( $\pi^*_{\text{phen}}$ ) [30%], HOMO-4 ( $\pi_{\text{BrBT}}$ ) → LUMO+5 ( $\pi^*_{\text{phen}}$ ) [23%], HOMO-8 ( $\pi_{\text{phen}}$ & $n_{\text{C=S}}$ ) → LUMO ( $\pi^*_{\text{phen}}$ ) [7%],                                                                                                                                                 |
| 301.14 | 0.1446 | HOMO-8 ( $\pi_{\text{phen}}$ & $n_{\text{C=S}}$ ) → LUMO + 1( $\pi^*_{\text{phen}}$ ) [9%], HOMO-7 ( $\pi_{\text{phen}}$ ) → LUMO ( $\pi^*_{\text{phen}}$ ) [30%], HOMO-5 ( $\pi_{\text{phen}}$ ) → LUMO+1 ( $\pi^*_{\text{phen}}$ ) [13%], HOMO-1 (Ru) → LUMO +7 ( $\pi^*_{\text{phen}}$ ) [10%]                                                                                        |
| 300.34 | 0.0764 | HOMO-7 ( $\pi_{\text{phen}}$ ) → LUMO ( $\pi^*_{\text{phen}}$ ) [8%], HOMO-6 ( $\pi_{\text{phen}}$ ) → LUMO ( $\pi^*_{\text{phen}}$ ) [48%], HOMO-6 ( $\pi_{\text{phen}}$ ) → LUMO+2 ( $\pi^*_{\text{phen}}$ ) [10%], HOMO-5 ( $\pi_{\text{phen}}$ ) → LUMO+1 ( $\pi^*_{\text{phen}}$ ) [6%]                                                                                             |
| 299.29 | 0.0872 | HOMO-7 ( $\pi_{\text{phen}}$ ) → LUMO ( $\pi^*_{\text{phen}}$ ) [23%], HOMO-7 ( $\pi_{\text{phen}}$ ) → LUMO+2 ( $\pi^*_{\text{phen}}$ ) [8%], HOMO-6 ( $\pi_{\text{phen}}$ ) → LUMO ( $\pi^*_{\text{phen}}$ ) [15%], HOMO-6 ( $\pi_{\text{phen}}$ ) → LUMO+2 ( $\pi^*_{\text{phen}}$ ) [9%], HOMO-5 ( $\pi_{\text{phen}}$ ) → LUMO+1 ( $\pi^*_{\text{phen}}$ ) [6%]                     |
| 286.81 | 0.0742 | HOMO-8 ( $\pi_{\text{phen}}$ & $n_{\text{C=S}}$ ) → LUMO + 1( $\pi^*_{\text{phen}}$ ) [7%], HOMO-8 ( $\pi_{\text{phen}}$ & $n_{\text{C=S}}$ ) → LUMO + 2( $\pi^*_{\text{phen}}$ ) [8%], HOMO-5 ( $\pi_{\text{phen}}$ ) → LUMO ( $\pi^*_{\text{phen}}$ ) [9%], HOMO-5 ( $\pi_{\text{phen}}$ ) → LUMO+1 ( $\pi^*_{\text{phen}}$ ) [32%], HOMO (Ru) → LUMO+9 ( $\pi^*_{\text{phen}}$ ) [5%] |
| 278.45 | 0.0352 | HOMO-3 ( $n_{\text{C=S}}$ ) → LUMO +7 ( $\pi^*_{\text{phen}}$ ) [25%], HOMO-8 ( $\pi_{\text{phen}}$ & $n_{\text{C=S}}$ ) → LUMO + 1( $\pi^*_{\text{phen}}$ ) [9%], HOMO-1 (Ru) → LUMO +8 ( $\pi^*_{\text{ligands}}$ ) [19%]                                                                                                                                                              |
| 276.47 | 0.4559 | HOMO-5 ( $\pi_{\text{phen}}$ ) → LUMO ( $\pi^*_{\text{phen-BrBT}}$ ) [42%], HOMO-8 ( $\pi^*_{\text{phen}}$ & $n_{\text{C=S}}$ ) → LUMO + 6( $\pi^*_{\text{phen-BrBT}}$ ) [16%]                                                                                                                                                                                                           |
| 272.95 | 0.0772 | HOMO-10 ( $\pi_{\text{phen}}$ ) → LUMO+1 ( $\pi^*_{\text{phen}}$ ) [9%], HOMO-10 ( $\pi_{\text{phen}}$ ) → LUMO+3 ( $\pi^*_{\text{phen}}$ ) [22%], HOMO-9 ( $\pi_{\text{phen}}$ ) → LUMO+2 ( $\pi^*_{\text{phen}}$ ) [26%]                                                                                                                                                               |
| 271.87 | 0.0249 | HOMO-10 ( $\pi_{\text{phen}}$ ) → LUMO+1 ( $\pi^*_{\text{phen}}$ ) [15%], HOMO-10 ( $\pi_{\text{phen}}$ ) → LUMO+2 ( $\pi^*_{\text{phen}}$ ) [7%], HOMO-9 ( $\pi_{\text{phen}}$ ) → LUMO+2 ( $\pi^*_{\text{phen}}$ ) [12%], HOMO-8 ( $\pi^*_{\text{phen-BT}}$ ) → LUMO+3 ( $\pi^*_{\text{phen}}$ ) [15%], HOMO-5 ( $\pi_{\text{phen}}$ ) → LUMO+4 ( $\pi^*_{\text{phen}}$ ) [8%]         |
| 270.66 | 0.0248 | HOMO-11 ( $\pi_{\text{phen}}$ ) → LUMO+1 ( $\pi^*_{\text{phen}}$ ) [11%], HOMO-10 ( $\pi_{\text{phen}}$ ) → LUMO+1 ( $\pi^*_{\text{phen}}$ ) [14%], HOMO-9 ( $\pi_{\text{phen}}$ ) → LUMO+3 ( $\pi^*_{\text{phen}}$ ) [7%], HOMO-10 ( $\pi_{\text{phen}}$ ) → LUMO+3 ( $\pi^*_{\text{phen}}$ ) [16%], HOMO-5 ( $\pi_{\text{phen}}$ ) → LUMO+4 ( $\pi^*_{\text{phen}}$ ) [23%]            |
| 269.49 | 0.0227 | HOMO-11 ( $\pi_{\text{phen}}$ ) → LUMO ( $\pi^*_{\text{phen}}$ ) [13%], HOMO-11 ( $\pi_{\text{phen}}$ ) → LUMO+1 ( $\pi^*_{\text{phen}}$ ) [7%], HOMO-10 ( $\pi_{\text{phen}}$ ) → LUMO+2 ( $\pi^*_{\text{phen}}$ ) [32%]                                                                                                                                                                |
| 266.16 | 0.0195 | HOMO-11 ( $\pi_{\text{phen}}$ ) → LUMO+3 ( $\pi^*_{\text{phen}}$ ) [74%]                                                                                                                                                                                                                                                                                                                 |
| 265.92 | 0.0628 | HOMO-9 ( $\pi_{\text{phen}}$ ) → LUMO+4 ( $\pi^*_{\text{phen}}$ ) [28%], HOMO-10 ( $\pi_{\text{phen-BrBT}}$ ) → LUMO+4 ( $\pi^*_{\text{phen}}$ ) [30%], HOMO-5 ( $\pi_{\text{phen}}$ ) → LUMO+4 ( $\pi^*_{\text{phen}}$ ) [11%]                                                                                                                                                          |
| 263.84 | 0.0762 | HOMO-9 ( $\pi_{\text{phen}}$ ) → LUMO+5 ( $\pi^*_{\text{phen}}$ ) [23%], HOMO-8 ( $\pi_{\text{phen-BrBT}}$ ) → LUMO+5 ( $\pi^*_{\text{phen}}$ ) [20%], HOMO-5 ( $\pi_{\text{phen}}$ ) → LUMO+5 ( $\pi^*_{\text{phen}}$ ) [8%]                                                                                                                                                            |

|        |        |                                                                                                                                                                                                                                                                                                                                                                                                                                                             |
|--------|--------|-------------------------------------------------------------------------------------------------------------------------------------------------------------------------------------------------------------------------------------------------------------------------------------------------------------------------------------------------------------------------------------------------------------------------------------------------------------|
| 263.65 | 0.1416 | HOMO-11 ( $\pi_{\text{phen}}$ ) $\rightarrow$ LUMO ( $\pi^*_{\text{phen}}$ ) [8%], HOMO-9 ( $\pi_{\text{phen}}$ ) $\rightarrow$ LUMO+4 ( $\pi^*_{\text{phen}}$ ) [18%], HOMO-8 ( $\pi_{\text{phen-BrBT}}$ ) $\rightarrow$ LUMO+4 ( $\pi^*_{\text{phen}}$ ) [16%], HOMO-11 ( $\pi_{\text{phen}}$ ) $\rightarrow$ LUMO+2 ( $\pi^*_{\text{phen}}$ ) [9%]                                                                                                       |
| 260.93 | 0.0217 | HOMO-6 ( $\pi_{\text{phen}}$ ) $\rightarrow$ LUMO+6 ( $\pi^*_{\text{phen}}$ ) [34%], HOMO-7 ( $\pi_{\text{phen}}$ ) $\rightarrow$ LUMO+6 ( $\pi^*_{\text{phen}}$ ) [8%], HOMO-10 ( $\pi_{\text{phen}}$ ) $\rightarrow$ LUMO+4 ( $\pi^*_{\text{phen}}$ ) [7%], HOMO-8 ( $\pi_{\text{phen-BrBT}}$ ) $\rightarrow$ LUMO+5 ( $\pi^*_{\text{phen}}$ ) [6%], HOMO-9 ( $\pi_{\text{phen}}$ ) $\rightarrow$ LUMO+5 ( $\pi^*_{\text{phen}}$ ) [5%]                   |
| 260.33 | 0.2027 | HOMO-6 ( $\pi_{\text{phen}}$ ) $\rightarrow$ LUMO+6 ( $\pi^*_{\text{phen-BrBT}}$ ) [28%], HOMO-11 ( $\pi_{\text{phen}}$ ) $\rightarrow$ LUMO+2 ( $\pi^*_{\text{phen}}$ ) [13%]                                                                                                                                                                                                                                                                              |
| 260.02 | 0.0232 | HOMO-9 ( $\pi_{\text{phen}}$ ) $\rightarrow$ LUMO+5 ( $\pi^*_{\text{phen}}$ ) [34%], HOMO-10 ( $\pi_{\text{phen}}$ ) $\rightarrow$ LUMO+5 ( $\pi^*_{\text{phen}}$ ) [21%], HOMO-10 ( $\pi_{\text{phen-BrBT}}$ ) $\rightarrow$ LUMO+5 ( $\pi^*_{\text{phen}}$ ) [18%]                                                                                                                                                                                        |
| 259.72 | 0.0745 | HOMO-7 ( $\pi_{\text{phen}}$ ) $\rightarrow$ LUMO+6 ( $\pi^*_{\text{phen-BrBT}}$ ) [17%], HOMO-10 ( $\pi_{\text{phen}}$ ) $\rightarrow$ LUMO+3 ( $\pi^*_{\text{phen}}$ ) [14%], HOMO-6 ( $\pi_{\text{phen}}$ ) $\rightarrow$ LUMO+5 ( $\pi^*_{\text{phen}}$ ) [10%], HOMO-8 ( $\pi_{\text{phen-BrBT}}$ ) $\rightarrow$ LUMO+5 ( $\pi^*_{\text{phen}}$ ) [6%], HOMO-9 ( $\pi_{\text{phen}}$ ) $\rightarrow$ LUMO+2 ( $\pi^*_{\text{phen}}$ ) [5%]            |
| 259.48 | 0.0439 | HOMO-7 ( $\pi_{\text{phen}}$ ) $\rightarrow$ LUMO+6 ( $\pi^*_{\text{phen-BrBT}}$ ) [46%], HOMO (Ru) $\rightarrow$ LUMO+11 ( $\pi^*_{\text{phen-BrBT}}$ ) [10%], HOMO-6 ( $\pi_{\text{phen}}$ ) $\rightarrow$ LUMO+6 ( $\pi^*_{\text{phen-BrBT}}$ ) [7%], HOMO (Ru) $\rightarrow$ LUMO+10 ( $\pi^*_{\text{Bz}}$ ) [7%]                                                                                                                                       |
| 258.78 | 0.0535 | HOMO (Ru) $\rightarrow$ LUMO+10 ( $\pi^*_{\text{Bz}}$ ) [21%], HOMO-7 ( $\pi_{\text{phen}}$ ) $\rightarrow$ LUMO+6 ( $\pi^*_{\text{phen-BrBT}}$ ) [13%], HOMO-4 ( $\pi_{\text{BrBT}}$ ) $\rightarrow$ LUMO+7 ( $\pi^*_{\text{phen}}$ ) [8%]                                                                                                                                                                                                                 |
| 258.36 | 0.0340 | HOMO-12 ( $\pi^*_{\text{Bz}}$ ) $\rightarrow$ LUMO ( $\pi^*_{\text{phen}}$ ) [42%], HOMO-12 ( $\pi_{\text{Bz}}$ ) $\rightarrow$ LUMO+1 ( $\pi^*_{\text{phen}}$ ) [13%], HOMO-4 ( $\pi_{\text{BrBT}}$ ) $\rightarrow$ LUMO+7 ( $\pi^*_{\text{phen}}$ ) [13%]                                                                                                                                                                                                 |
| 257.76 | 0.1299 | HOMO-11 ( $\pi_{\text{phen}}$ ) $\rightarrow$ LUMO+4 ( $\pi^*_{\text{phen}}$ ) [29%], HOMO-4 ( $\pi_{\text{BrBT}}$ ) $\rightarrow$ LUMO+7 ( $\pi^*_{\text{phen}}$ ) [17%], HOMO-12 ( $\pi_{\text{Bz}}$ ) $\rightarrow$ LUMO ( $\pi^*_{\text{phen}}$ ) [14%]                                                                                                                                                                                                 |
| 256.86 | 0.0637 | HOMO-11 ( $\pi_{\text{phen}}$ ) $\rightarrow$ LUMO+4 ( $\pi^*_{\text{phen}}$ ) [57%], HOMO-4 ( $\pi_{\text{BrBT}}$ ) $\rightarrow$ LUMO+7 ( $\pi^*_{\text{phen}}$ ) [19%]                                                                                                                                                                                                                                                                                   |
| 256.59 | 0.8369 | HOMO-9 ( $\pi_{\text{phen}}$ ) $\rightarrow$ LUMO+3 ( $\pi^*_{\text{phen}}$ ) [18%], HOMO-10 ( $\pi_{\text{phen}}$ ) $\rightarrow$ LUMO+2 ( $\pi^*_{\text{phen}}$ ) [12%], HOMO-6 ( $\pi_{\text{phen}}$ ) $\rightarrow$ LUMO+4 ( $\pi^*_{\text{phen}}$ ) [10%], HOMO-7 ( $\pi_{\text{phen}}$ ) $\rightarrow$ LUMO+5 ( $\pi^*_{\text{phen}}$ ) [7%]                                                                                                          |
| 255.92 | 0.0516 | HOMO-8 ( $\pi_{\text{phen-BrBT}}$ ) $\rightarrow$ LUMO+6 ( $\pi^*_{\text{phen-BrBT}}$ ) [29%], HOMO-14 ( $\pi_{\text{BrBT}}$ ) $\rightarrow$ LUMO+7 ( $\pi^*_{\text{phen-BrBT}}$ ) [15%], HOMO-14 ( $\pi_{\text{BrBT}}$ ) $\rightarrow$ LUMO+1 ( $\pi^*_{\text{phen}}$ ) [13%], HOMO-14 ( $\pi_{\text{BrBT}}$ ) $\rightarrow$ LUMO ( $\pi^*_{\text{phen}}$ ) [10%], HOMO-4 ( $\pi_{\text{BrBT}}$ ) $\rightarrow$ LUMO+5 ( $\pi^*_{\text{phen-BrBT}}$ ) [7%] |
| 253.84 | 0.1092 | HOMO-1 (Ru) $\rightarrow$ LUMO+11 ( $\pi^*_{\text{phen-BrBT}}$ ) [18%], HOMO-1 (Ru) $\rightarrow$ LUMO+10 ( $\pi^*_{\text{phen}}$ ) [14%], HOMO-2 (Ru) $\rightarrow$ LUMO+11 ( $\pi^*_{\text{phen-BrBT}}$ ) [9%], HOMO-2 (Ru) $\rightarrow$ LUMO+10 ( $\pi^*_{\text{Bz}}$ ) [7%]                                                                                                                                                                            |
| 252.97 | 0.0870 | HOMO-2 (Ru) $\rightarrow$ LUMO+11 ( $\pi^*_{\text{phen}}$ ) [28%], HOMO-2 (Ru) $\rightarrow$ LUMO+10 ( $\pi^*_{\text{phen}}$ ) [24%], HOMO-1 (Ru) $\rightarrow$ LUMO+11 ( $\pi^*_{\text{phen}}$ ) [5%]                                                                                                                                                                                                                                                      |
| 250.99 | 0.0220 | HOMO-12 ( $\pi_{\text{Bz}}$ ) $\rightarrow$ LUMO+10 ( $\pi^*_{\text{phen}}$ ) [53%], HOMO-12 ( $\pi_{\text{Bz}}$ ) $\rightarrow$ LUMO+11 ( $\pi^*_{\text{phen}}$ ) [28%]                                                                                                                                                                                                                                                                                    |
| 247.92 | 0.0424 | HOMO (Ru) $\rightarrow$ LUMO+15 ( $\pi^*_{\text{phen}}$ ) [73%], HOMO (Ru) $\rightarrow$ LUMO+14 ( $\pi^*_{\text{phen}}$ ) [15%]                                                                                                                                                                                                                                                                                                                            |
| 247.55 | 0.0516 | HOMO-11 ( $\pi_{\text{phen}}$ ) $\rightarrow$ LUMO+6 ( $\pi^*_{\text{phen-BrBT}}$ ) [48%], HOMO-12 ( $\pi_{\text{Bz}}$ ) $\rightarrow$ LUMO+6 ( $\pi^*_{\text{phen-BrBT}}$ ) [7%], HOMO-12 ( $\pi_{\text{Bz}}$ ) $\rightarrow$ LUMO+6 ( $\pi^*_{\text{phen-BrBT}}$ ) [7%]                                                                                                                                                                                   |
| 244.26 | 0.0313 | HOMO-1 (Ru) $\rightarrow$ LUMO+13 ( $\pi^*_{\text{ligand}}$ ) [39%], HOMO-2 (Ru) $\rightarrow$ LUMO+15 ( $\pi^*_{\text{phen-BrBT}}$ ) [37%], HOMO (Ru) $\rightarrow$ LUMO+14 ( $\pi^*_{\text{phen}}$ ) [12%]                                                                                                                                                                                                                                                |
